# Supplementary material for: Surface modification enhances the bulk proton conductivity of Prussian blue
Source: Royal Society of Chemistry journal article supplement (doi:10.1039/d3cc00629h), 2023-01-01
Supplement: d3cc00629h1.pdf [file d3cc00629h1.pdf]

1 Supporting Information

2

3 **Surface modulation enhances the bulk proton conductivity of Prussian blue**

4

5 Akira Takahashi<sup>a\*</sup>, Yasuhito Matsubayashi<sup>b</sup>, Atsushi Sakurai<sup>a</sup>, Yutaka Sugiyama<sup>a</sup>,

6 Keiko Noda<sup>a</sup> and Tohru Kawamoto<sup>a</sup>

7 <sup>a</sup>Nanomaterials Research Institute, National Institute of Advanced Industrial Science

8 and Technology (AIST), 1- 1-1 Higashi, Tsukuba 305-8565, Japan

9 <sup>b</sup>Advanced Coating Technology Research Center, National Institute of Advanced

10 Industrial Science and Technology (AIST), 1- 1-1 Higashi, Tsukuba 305-8565, Japan

11

12

Author information

13

\*Corresponding author. Email: akira-takahashi@aist.go.jp

14

|    |                                                                                               |     |
|----|-----------------------------------------------------------------------------------------------|-----|
| 1  | Table of contents                                                                             |     |
| 2  | S1. Synthesis of Prussian blue samples                                                        | P3  |
| 3  | S1-1. Prussian blue                                                                           | P3  |
| 4  | S1-2. Manganese Prussian blue analogue                                                        | P3  |
| 5  | S1-3. Copper Prussian blue analogue                                                           | P4  |
| 6  | S2. General information for experiments                                                       | P5  |
| 7  | S3. Scanning electronic microscope image                                                      | P5  |
| 8  | S4. Dispersed particle size in water                                                          | P6  |
| 9  | S5. Estimation of ideal amount of $\text{Na}_4[\text{Fe}(\text{CN})_6]$ ( $SM_{\text{cal}}$ ) | P6  |
| 10 | S6. Conductivity measurement                                                                  | P7  |
| 11 | S6-1. Pellet method                                                                           | P7  |
| 12 | S6-2. Mould method                                                                            | P7  |
| 13 | S6-3. Verification of mould method accuracy                                                   | P7  |
| 14 | S6-4. Proton conductivity of PBAs                                                             | P9  |
| 15 | S7. Water adsorption isotherm                                                                 | P9  |
| 16 | SI references                                                                                 | P10 |
| 17 |                                                                                               |     |
| 18 | This SI contains 10 pages. 3 tables, and 6 figures.                                           |     |
| 19 |                                                                                               |     |
| 20 |                                                                                               |     |

## 1 S1. Synthesis of Prussian blue samples

### 2 S1-1. Prussian blue (PB)

3 *PB without surface modification (PB-core)*:  $\text{Fe}(\text{NO}_3)_3$  (aq), consisting of 8 mmol of  
4  $\text{Fe}(\text{NO}_3)_3 \cdot 9\text{H}_2\text{O}$  and 15 mL of ultrapure water, and  $\text{Na}_4[\text{Fe}(\text{CN})_6]$  (aq), consisting of 5.99  
5 mmol of  $\text{Na}_4[\text{Fe}(\text{CN})_6] \cdot 10\text{H}_2\text{O}$  and 15 mL of ultrapure water, were mixed in a 50 mL  
6 centrifuge tube. The solution was mixed for 3 min using a vibrator at 2200 rpm. To  
7 purify the PBs, the tube was centrifuged at 4000 rpm for 15 min, and the supernatant  
8 was removed. To dilute the by-product salt, an equal amount of ultrapure water was  
9 added to the tube. This purification process was performed until the concentration of  
10  $\text{NO}_3^-$  in the supernatant was below 600 ppm. The concentration of  $\text{NO}_3^-$  was measured  
11 using an ion meter (LAQUA Twin NO3, HORIBA Advanced Techno, Co., Ltd.). After  
12 purification, the PB-core slurry dried by evaporation at 60 °C and 70 hPa to yield the  
13 PB-core powder.

14

15 *PB with surface modification (PB-SM)*: The PB-core slurry and aqueous solution  
16 consisting of additional  $\text{Na}_4[\text{Fe}(\text{CN})_6] \cdot 10\text{H}_2\text{O}$  (see Table S1) and 10 mL of ultrapure  
17 water were stirred with a magnetic stirrer for three days at room temperature. After  
18 mixing, the PB-SM powder was obtained by drying the slurry by evaporation at 60 °C  
19 and 70 hPa.

20

Table S1. \_\_\_\_\_

| Sample  | PB-core synthesis                                              |                                                                            | Surface modulation                                                         |
|---------|----------------------------------------------------------------|----------------------------------------------------------------------------|----------------------------------------------------------------------------|
|         | $\text{Fe}(\text{NO}_3)_3 \cdot 9\text{H}_2\text{O}$<br>(mmol) | $\text{Na}_4[\text{Fe}(\text{CN})_6] \cdot 10\text{H}_2\text{O}$<br>(mmol) | $\text{Na}_4[\text{Fe}(\text{CN})_6] \cdot 10\text{H}_2\text{O}$<br>(mmol) |
| PB-core | 8.00                                                           | 5.99                                                                       | 0                                                                          |
| PB-SM14 | 8.00                                                           | 5.99                                                                       | 1.12                                                                       |
| PB-SM26 | 8.00                                                           | 5.99                                                                       | 2.10                                                                       |
| PB-SM52 | 8.00                                                           | 5.99                                                                       | 4.20                                                                       |

21

### 22 S1-2. Manganese Prussian blue analogue (MnPBA)

23 *MnPBA without surface modification (MnPBA-core)*:  $\text{MnCl}_2$ , consisting of 1.5 mmol of  
24  $\text{MnCl}_2 \cdot 4\text{H}_2\text{O}$  and 3 mL of ultrapure water, and  $\text{Na}_4[\text{Fe}(\text{CN})_6]$  (aq), consisting of 0.75  
25 mmol of  $\text{Na}_4[\text{Fe}(\text{CN})_6] \cdot 10\text{H}_2\text{O}$  and 3 mL of ultrapure water, were mixed in a 50 mL  
26 centrifuge tube. The solution was mixed for 3 min with handshake. To purify the PBs,  
27 the tube was centrifuged at 3000 rpm for 3 min, and the supernatant was removed. To  
28 dilute the by-product salt, 40mL of ultrapure water was added to the tube. This

1 purification process was performed twice. After purification, the MnPB-core slurry  
2 dried at 60 °C to yield the PB-core powder.

3

4 *MnPBA with surface modification (MnPBA-SM26)*: The MnPBA-core slurry and  
5 aqueous solution consisting of 0.39 mmol  $\text{Na}_4[\text{Fe}(\text{CN})_6] \cdot 10\text{H}_2\text{O}$  and 5 mL of ultrapure  
6 water were shaken 3 hours at room temperature. After mixing, the MnPBA-SM26  
7 powder was obtained by drying the slurry at 60 °C.

8

### 9 **S1-3. Copper Prussian blue analogue (CuPBA)**

10 *CuPBA without surface modification (CuPBA-core)*:  $\text{CuSO}_{4\text{aq}}$ , consisting of 1.5 mmol  
11 of the  $\text{CuSO}_4 \cdot 5\text{H}_2\text{O}$  and 3 mL of ultrapure water, and  $\text{Na}_4[\text{Fe}(\text{CN})_6]_{\text{aq}}$ , consisting of  
12 0.75 mmol of  $\text{Na}_4[\text{Fe}(\text{CN})_6] \cdot 10\text{H}_2\text{O}$  and 3 mL of ultrapure water, were mixed in a 50  
13 mL centrifuge tube. The solution was mixed for 3 min with handshake. To purify the  
14 PBs, the tube was centrifuged at 3000 rpm for 3 min, and the supernatant was removed.  
15 To dilute the by-product salt, 40mL of ultrapure water was added to the tube. This  
16 purification process was performed twice. After purification, the MnPB-core slurry  
17 dried at 60 °C to yield the PB-core powder.

18

19 *CuPBA with surface modification (CoPBA-SM26)*: The CuPBA-core slurry and  
20 aqueous solution consisting of 0.39 mmol  $\text{Na}_4[\text{Fe}(\text{CN})_6] \cdot 10\text{H}_2\text{O}$  and 5 mL of ultrapure  
21 water were shaken 3 hours at room temperature. After mixing, the MnPBA-SM26  
22 powder was obtained by drying the slurry at 60 °C.

23

## 1 **S2. General information for experiments**

2 Fourier transform infrared (FTIR) spectra were obtained using an FTIR spectrometer (Nicolet iS5,  
3 Thermo Fisher Scientific Inc.). The crystal structures of the samples were evaluated using powder X-  
4 ray diffraction (PXRD) (D8 Advance, Bruker Corp.) with a Cu K $\alpha$  X-ray source ( $\lambda= 0.154$  nm) at 40  
5 kV and 40 mA.

6 The chemical compositions of the PB samples were evaluated using the following methods. First, the  
7 concentrations of sodium and iron cations were evaluated using microwave plasma atomic emission  
8 spectroscopy (MP-AES, MP-4100, Agilent Technologies Inc.) after sample decomposition with nitric  
9 acid and hydrochloric acid (Multiwave 3000, PerkinElmer Inc.). Next, the concentrations of carbon,  
10 nitrogen, and hydrogen were determined using a CHN analyser (EA-1110).

11 Dispersion properties of PBs in water were evaluated with preparing 1000 mg/L of aqueous solution  
12 of them dispersed by ultrasonic clear for 1 hour. Zeta potentials of PBs in water were evaluated using  
13 Zetasizer NanoZS (Malvern Panalytical Ltd.).

14

## 15 **S3. Scanning electronic microscope image**

16 The images of scanning electronic microscope (SEM) were observed with S-4800  
17 (Hitachi High-Tec Corp.). Primary particle sizes of PBs were less than 10 nm.

18

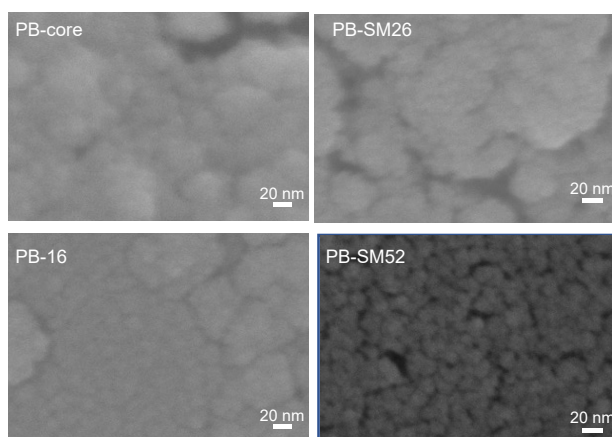

19

20

21

22

**Figure S1.** SEM images of PBs

1 **S4. Dispersed particle size in water**

2 Dispersed particle sizes of PBs in water were evaluated with dynamic light  
 3 scattering (DLS) using EISZ-2000 (Ostuka electronics co. LTD.).  
 4

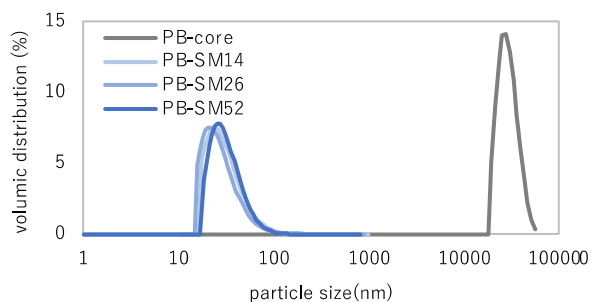

5  
 6  
 7

**Figure S2.** Volumetric distribution of dispersed particle size of PBs in water

8 **S5. Estimation of ideal amount of  $\text{Na}_4[\text{Fe}(\text{CN})_6]$  ( $SM_{cal}$ )**

9 We assumed that one  $\text{Na}_4[\text{Fe}(\text{CN})_6]$  anion was captured on one  $\text{Fe}^{3+}$  site on the surface  
 10 of the PB nanoparticles. The ideal amount of  $\text{Na}_4[\text{Fe}(\text{CN})_6]$ ,  $SM_{cal}$  was calculated as  
 11 follows:

$$SM_{cal} = SSA \times D_{site} \times M \times 100 = 23.0 \text{ (at\%)}$$

12 where  $SSA$  is the specific surface area of the PB nanoparticles,  $D_{site}$  is the  $\text{Fe}^{3+}$  site  
 13 density on the surface, and  $M$  is the molar weight of PB. The obtained values are listed  
 14 in Table S2.

15  
 16  
 17

Table S2. Parameters for estimation of ideal amount of  $\text{Na}_4[\text{Fe}(\text{CN})_6]$  ( $SM_{cal}$ )

|                                                                             | Symbol     | Value                                               | Comment and reference                           |
|-----------------------------------------------------------------------------|------------|-----------------------------------------------------|-------------------------------------------------|
| Avogadro constant ( $\text{mol}^{-1}$ )                                     | $N_A$      | $6.02214076 \times 10^{23}$                         | NIST                                            |
| Diameter of particle (m)                                                    | $r$        | $7.4 \times 10^{-9}$                                | See Table 1 in the main manuscript              |
| Molar weight of PB (g/mol)                                                  | $M$        | 314                                                 | Calculated from chemical composition of PB-Core |
| Crystal density ( $\text{g}/\text{m}^3$ )                                   | $\rho$     | $1.78 \times 10^6$                                  | reference <sup>1</sup>                          |
| $\text{Fe}^{3+}$ site density on the surface<br>( $\text{mol}/\text{m}^2$ ) | $D_{site}$ | $4 \times \frac{1}{4} + 1 / (1.017 \times 10^{-6})$ | (<br>See Fig. 3(c) in the main manuscript       |
| Specific surface area ( $\text{m}^2/\text{g}$ )                             | $SSA$      | $3/pr$                                              | Assuming a sphere shape                         |

18  
 19 **S6. Conductivity measurement**

1 Conductivity measurements were performed using a precision impedance analyser  
2 (4294A, Agilent Technology) using the quasi-four-probe method in the frequency range  
3 of 40 Hz to 110 MHz. The humidity of each sample was tuned using N<sub>2</sub> gas and  
4 ultrapure water using a humidity controller (AHCU-2, KITZ MICRO FILTER Corp.).

5

#### 6 **S6-1. Pellet method**

7 The sample powder was pelletized with a 7 mm pelletizer made of stainless steel. The  
8 pellets were obtained by pressing the pelletizer at 100 kg/cm<sup>2</sup> for 5 min. The electrodes  
9 were attached to an electron-conducting paste (TK PASTE CN-7120) at the bottom and  
10 top of the pellet.

11

#### 12 **S6-2. Mould method**

13 Cylindrical moulds made of polylactic acid (PLA) with a height of 10 mm and diameter  
14 of 12.9 mm were printed using a 3D printer. The moulds contained a rectangular groove  
15 on the top to fill the sample. Aluminium tape was attached to both sides of the groove as  
16 electrodes. The groove was filled with the sample powder and pressed with 13 mm  
17 pelletizer at 100 kg/cm<sup>2</sup> for 5 min.

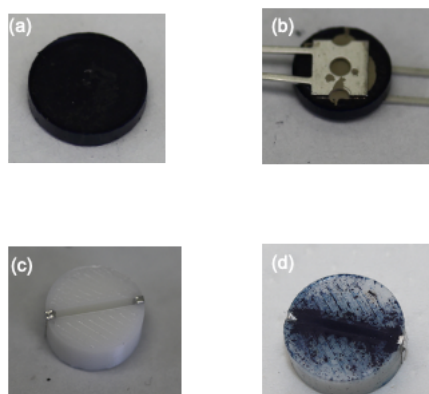

18

19 **Figure S3.** Pictures of (a) pellet, (b) pellet with electrode, (c) mould made of PLA, and  
20 (d) mould filled with sample powder.

21

1 **S6-3. Verification of mould method accuracy**

2 To verify the accuracy of the mould method, samples with known ion or electron  
3 conductivities were evaluated using the pellet and mould methods. The samples and  
4 their charge carriers are listed in Table S3. Graphite could not be evaluated using the  
5 pellet method because its conductivity was too high to evaluate for the pellet shape. The  
6 conductivities evaluated by the mould method were similar to those reported for the  
7 pellet method.

8

Table S3

| Sample           | Source                                    | Carrier         | Referenc<br>e |
|------------------|-------------------------------------------|-----------------|---------------|
| PbF <sub>2</sub> | Lead(II) fluoride (Wako chemical)         | F <sup>-</sup>  | 2             |
| AgCl             | Silver(I) chloride (Wako chemical, 99.5%) | Ag <sup>+</sup> | 3             |
| Graphite         | Graphite powder (Wako chemical)           | e <sup>-</sup>  | 4             |

9

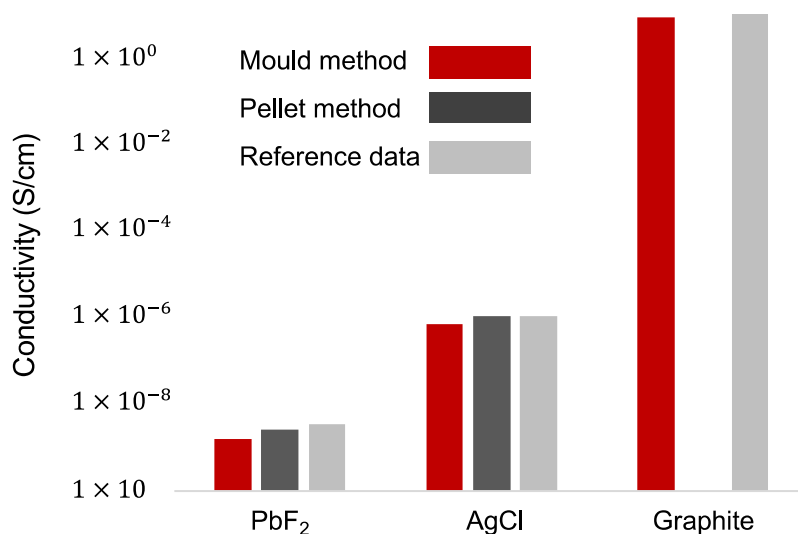

10

11 Figure S4. Conductivities of samples prepared by moulding (red bars), pellet method (dark grey  
12 bars), and value from reference (light grey bars).

13



## 1 S6-4 Proton conductivity of PBAs

2 The enhancement of bulk conductivity was demonstrated with Prussian blue analogues  
3 of MnPBA and CuPBA. Both of them showed the enhancement with the surface  
4 modification as same as PB.

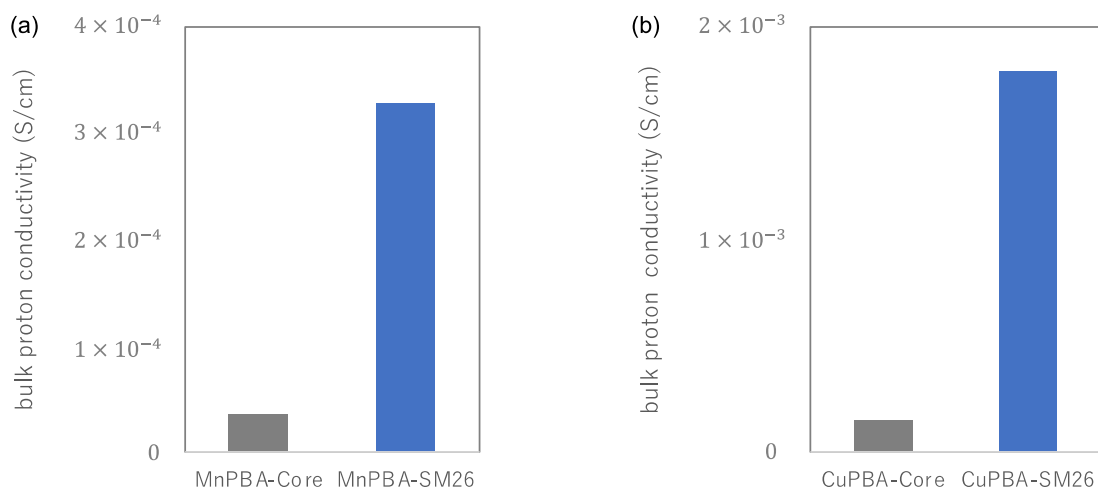

5

6 Figure S5. Proton conductivities of PBAs with and without surface modification at room  
7 temperature, 90RH% : (a) MnPBA, (b) CuPBA

8

## 9 S7. Water adsorption isotherm

10 Water adsorption isotherm of PB-SM26 at  $25^{\circ}\text{C}$  was evaluated with constant volume  
11 method using BelsorpMAX (MicrotracBEL Corp.). The measurement was performed  
12 after vacuuming the sample at  $100^{\circ}\text{C}$  for 23 hours.

13

14

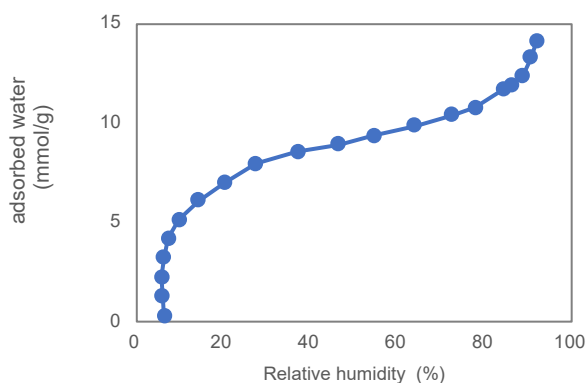

15

16

Figure S6. Water adsorption isotherm of PB-SM26 at  $25^{\circ}\text{C}$

17

1 **SI references**

2 1 H. J. Buser, D. Schwarzenbach, W. Petter and A. Ludi, *Inorg. Chem.*, 1977, **16**,  
3 2704.

4 2 I. D. Raistrick, C. Ho, W. Hu and R. A. Huggins, *J. Electroanal. Chem*, 1977, **77**,  
5 319.

6 3 K. Zierold, M. Wentz and F. Granzer, *Ion. Conduct. Meas. HEAVILY DOPED*  
7 *AgCl Cd CRYSTALS. J. Phys. Colloq.*, 1973, **34**.

8 4 W. W. Tyler and A. C. Wilson, 1953, **89**.

9
