# Supplementary figures and images for: Surface modification enhances the bulk proton conductivity of Prussian blue
Source: Royal Society of Chemistry journal article supplement (doi:10.1039/d3cc00629h), 2023-01-01

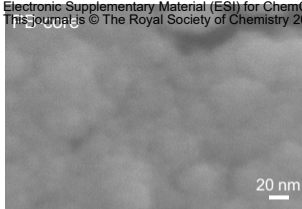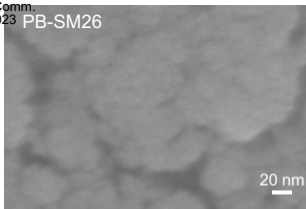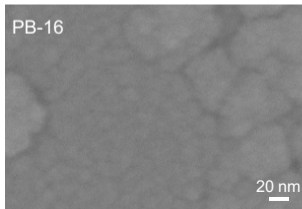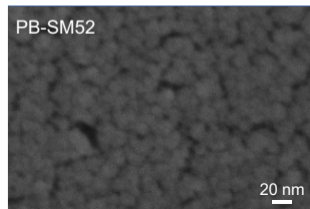

Supplement: d3cc00629h3.pdf [file d3cc00629h3.pdf]

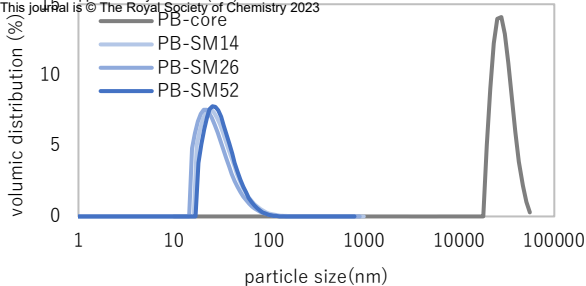

Supplement: d3cc00629h4.pdf [file d3cc00629h4.pdf]

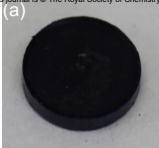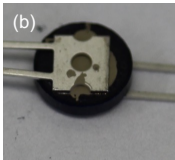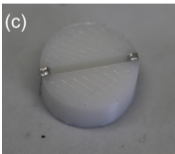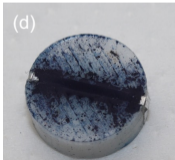

Supplement: d3cc00629h5.pdf [file d3cc00629h5.pdf]

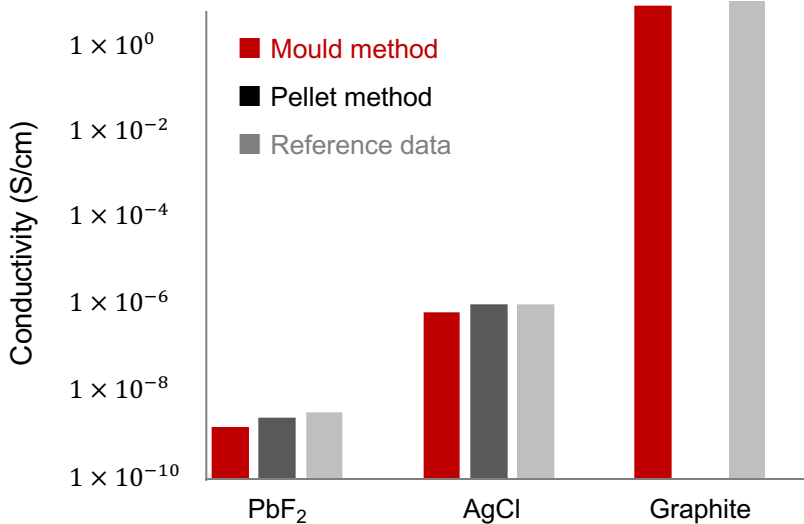

Supplement: d3cc00629h6.pdf [file d3cc00629h6.pdf]

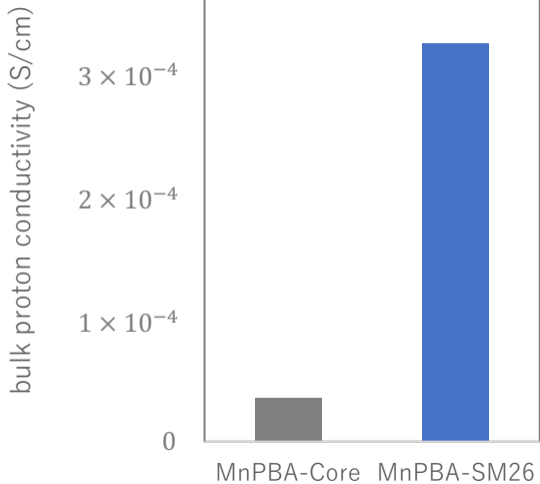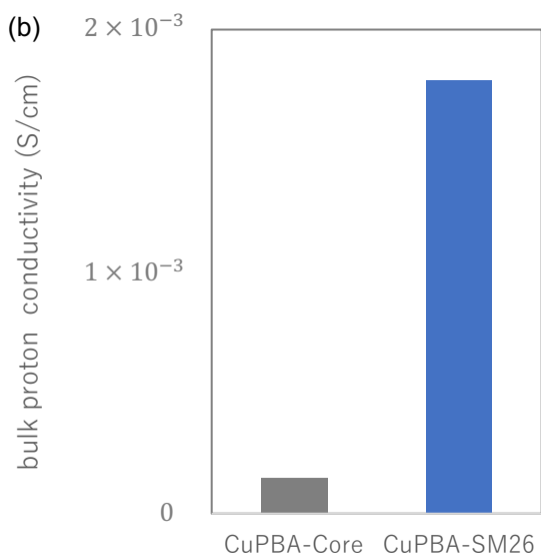

Supplement: d3cc00629h7.pdf [file d3cc00629h7.pdf]

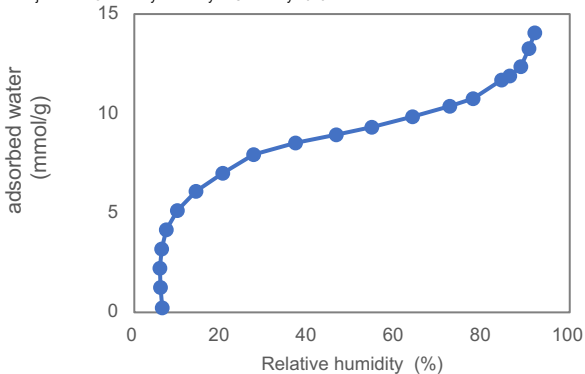

Supplement: d3cc00629h8.pdf [file d3cc00629h8.pdf]
